# Supplementary material
Source: HighWire-hosted journal article supplement (https://www.canjsurg.ca/highwire/filestream/96825/field_highwire_adjunct_files/0/cjs-010217-1-at.pdf)

**Appendix 1** to Lurati Buse G, Manns B, Lamy A, et al. Troponin T monitoring to detect myocardial injury after noncardiac surgery: a cost–consequence analysis. *Can J Surg* 2018.

DOI: 10.1503/cjs.010217

Copyright © 2018 The Author(s) or their employer(s).

To receive this resource in an accessible format, please contact us at [cmajgroup@cmaj.ca](mailto:cmajgroup@cmaj.ca).

*Online appendices are unedited and posted as supplied by the authors.*

## Appendix 1. Supplementary figures

**Figure S1.** Incremental cost-effectiveness plane of a TnT monitoring vs standard care. Each point represents a mean estimated incremental cost/ additional detected MINS pair generated by second order Monte Carlo simulation.

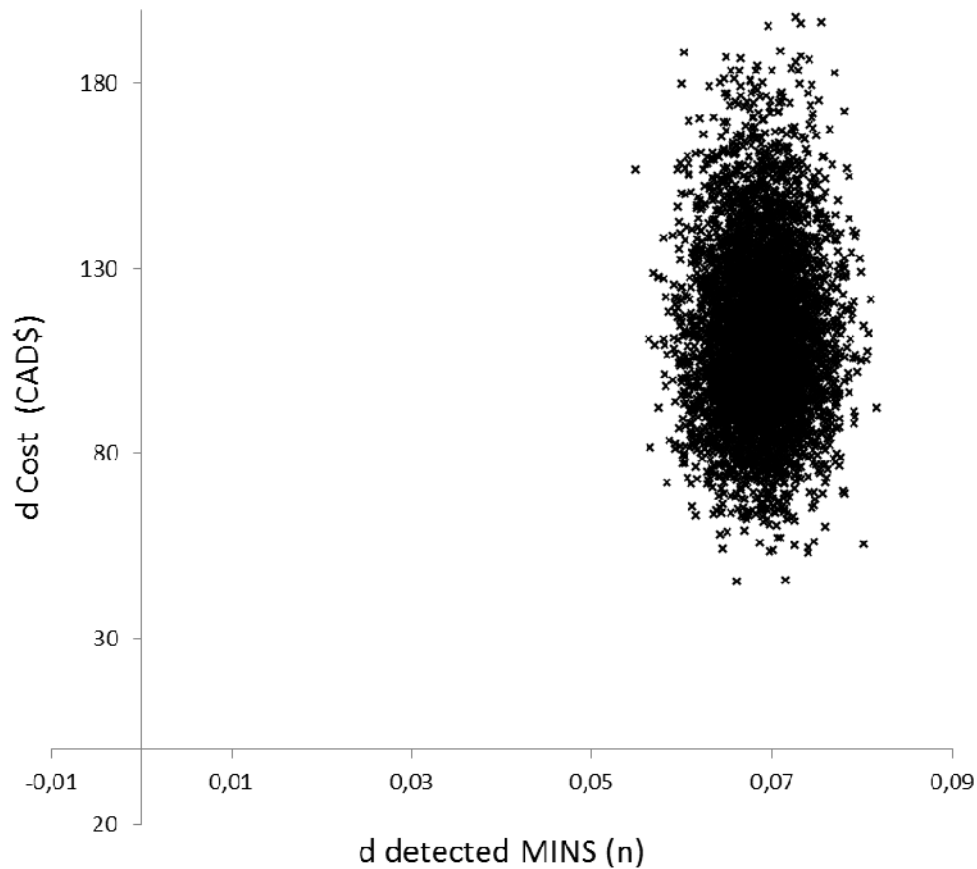

Online appendices are unedited and posted as supplied by the authors.

Figure S2. Cost-effectiveness acceptability curve for patients at various risk of MINS.

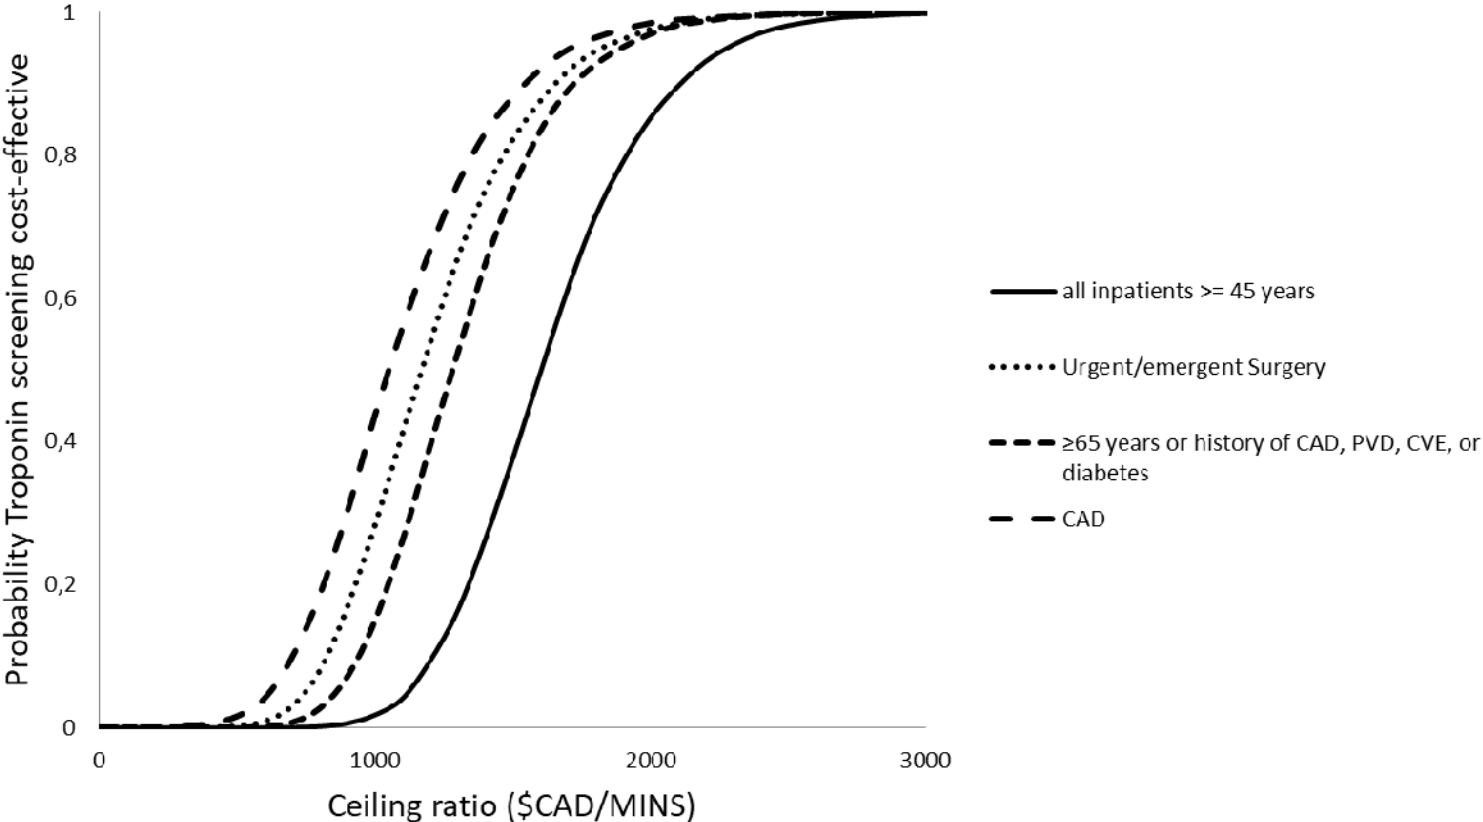

Supplement: cjs-010217-1-at.pdf [file cjs-010217-1-at.pdf]
